# Supplementary material
Source: MDPI journal article supplement (https://www.mdpi.com/1424-8247/14/4/379)
Supplement: s1 [file s1]

# Aminoalkylamides of Eremomycin Exhibit Improved Antibacterial Activity

Elena I. Moiseenko<sup>1</sup>, Réka Erdei<sup>2</sup>, Natalia E. Grammatikova<sup>1</sup>, Elena P. Mirchink<sup>1</sup>, Elena B. Isakova<sup>1</sup>, Eleonora R. Pereverzeva<sup>1</sup>, Gyula Batta<sup>2</sup>, Andrey E. Shchekotikhin<sup>1\*</sup>

<sup>1</sup> Gause Institute of New Antibiotics, Moscow, 119021, Russian Federation;

<sup>2</sup> Department of Organic Chemistry, University of Debrecen, H-4032 Debrecen, Egyetem tér 1, Hungary;

\* Correspondence: shchekotikhin@gause-inst.ru

## Supplementary Material

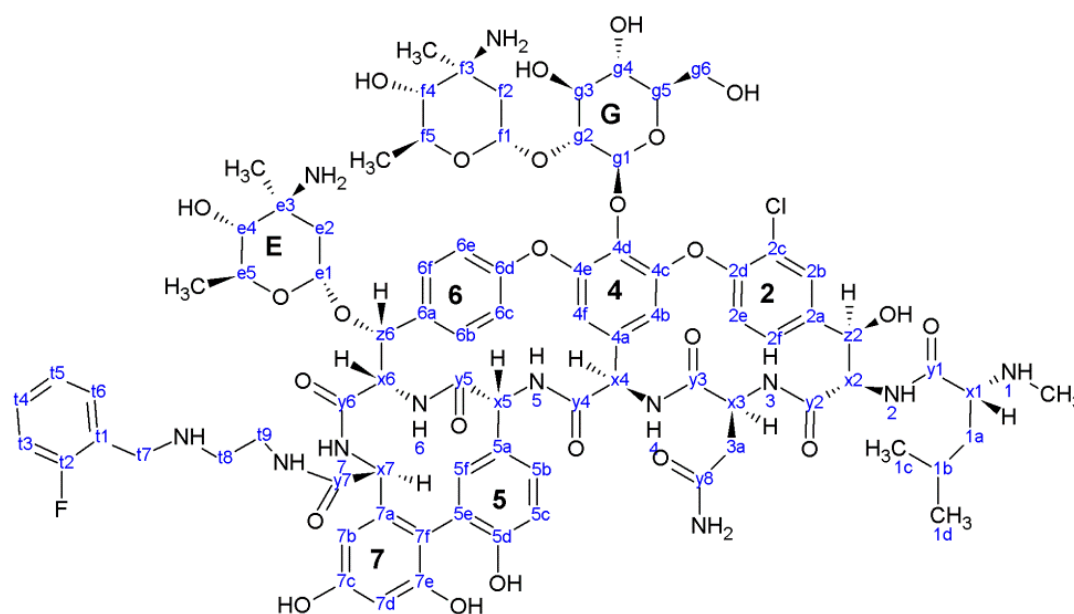

**Figure S1.** Atom's numeration for <sup>13</sup>C nuclear magnetic resonance spectra of eremomycin N-(2-((2-fluorobenzyl)amino)ethyl)amide (**4e**).

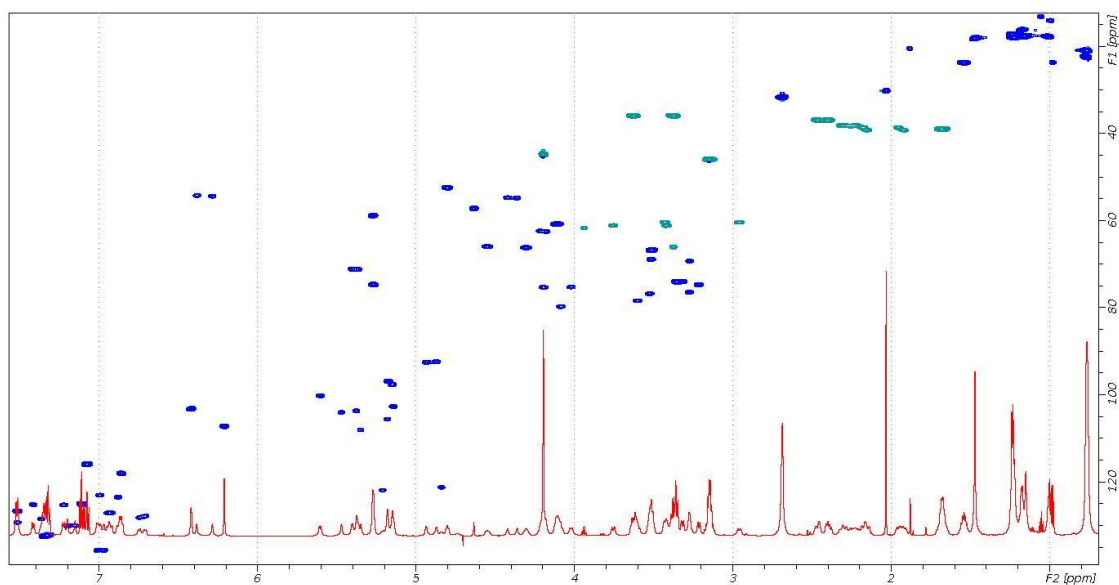

Figure S2. 4e,  $^1\text{H}$ - $^{13}\text{C}$  correlation, 288K, D $_2\text{O}$ , 700 MHz  $^1\text{H}$ -NMR Spectrometer.

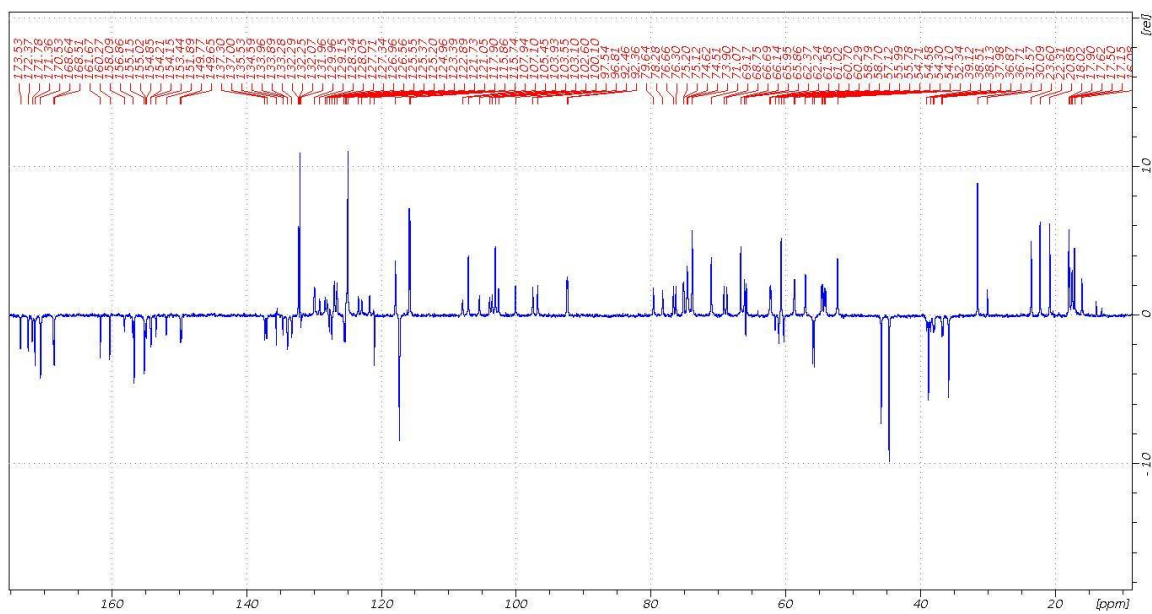

Figure S3. 4e,  $^{13}\text{C}$ - NMR, 288K, D $_2\text{O}$ , 700 MHz.

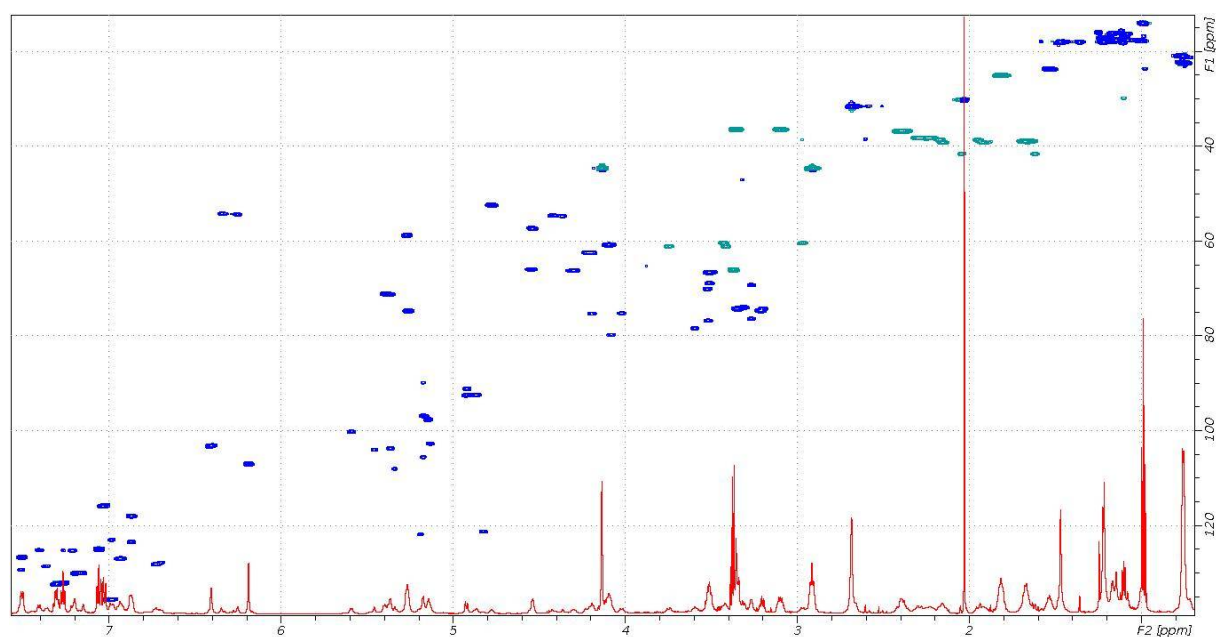

**Figure S4.** 4f,  $^1\text{H}$ - $^{13}\text{C}$  correlation, 288K, D<sub>2</sub>O, 700 MHz  $^1\text{H}$ -NMR Spectrometer.

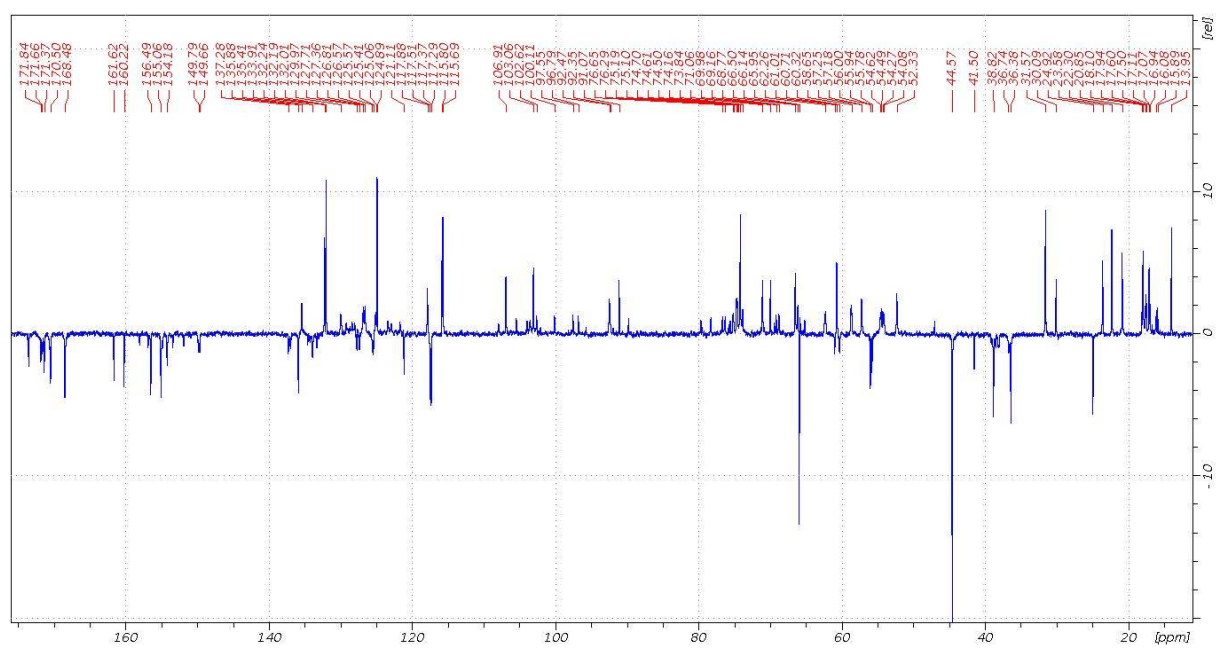

**Figure S5.** 4f,  $^{13}\text{C}$ - NMR, 288K, D<sub>2</sub>O, 700 MHz.

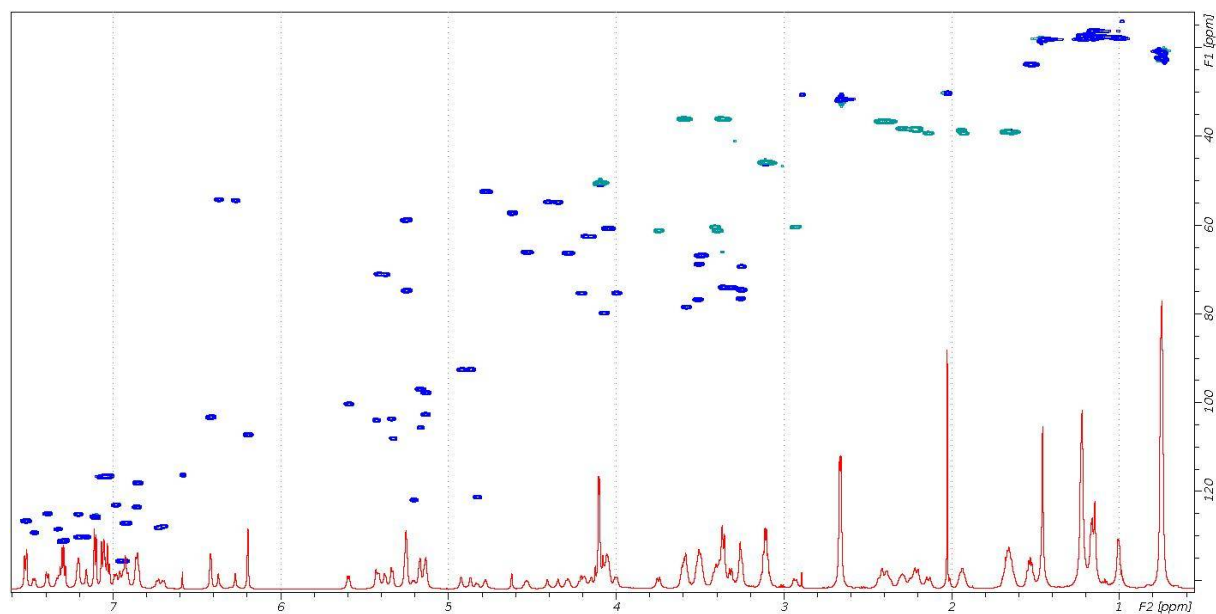

**Figure S6.** 4g,  $^1\text{H}$ - $^{13}\text{C}$  correlation, 288K, D<sub>2</sub>O, 700 MHz  $^1\text{H}$ -NMR Spectrometer.

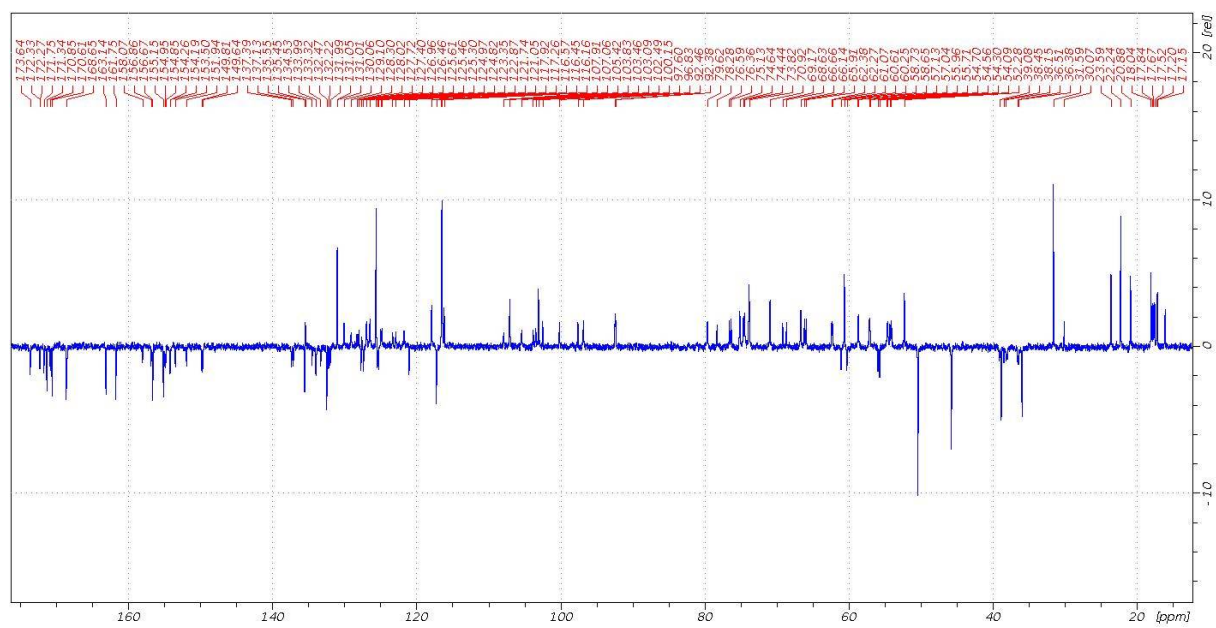

**Figure S7.** 4g,  $^{13}\text{C}$ - NMR, 288K, D<sub>2</sub>O, 700 MHz.

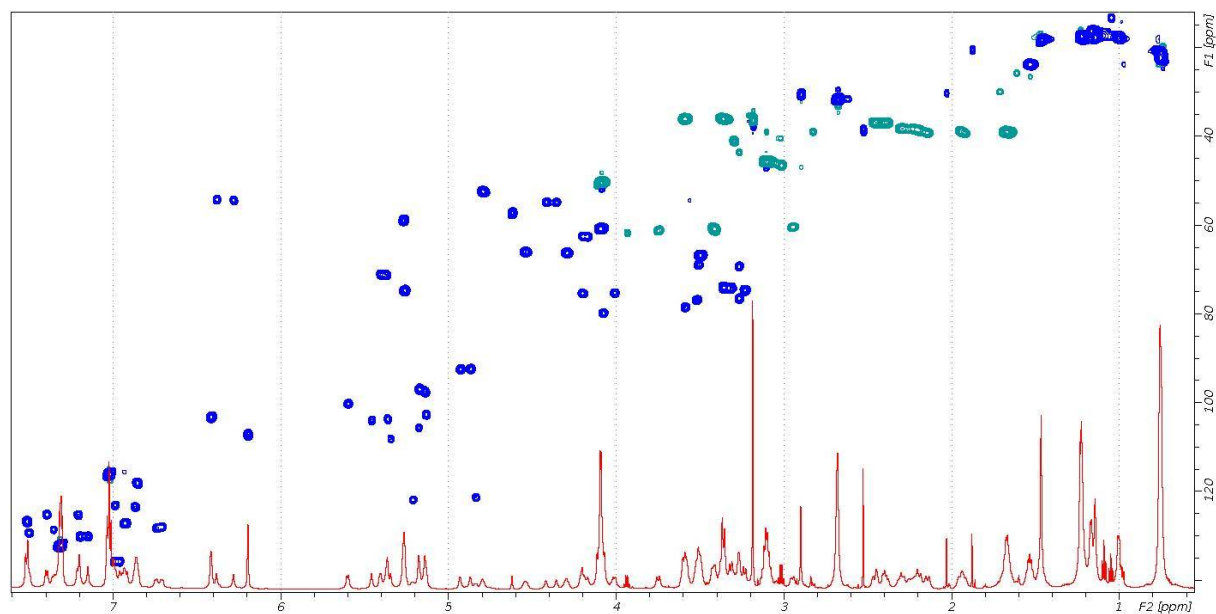

**Figure S8.** 4h,  $^1\text{H}$ - $^{13}\text{C}$  correlation, 288K, D<sub>2</sub>O, 700 MHz  $^1\text{H}$ -NMR Spectrometer.

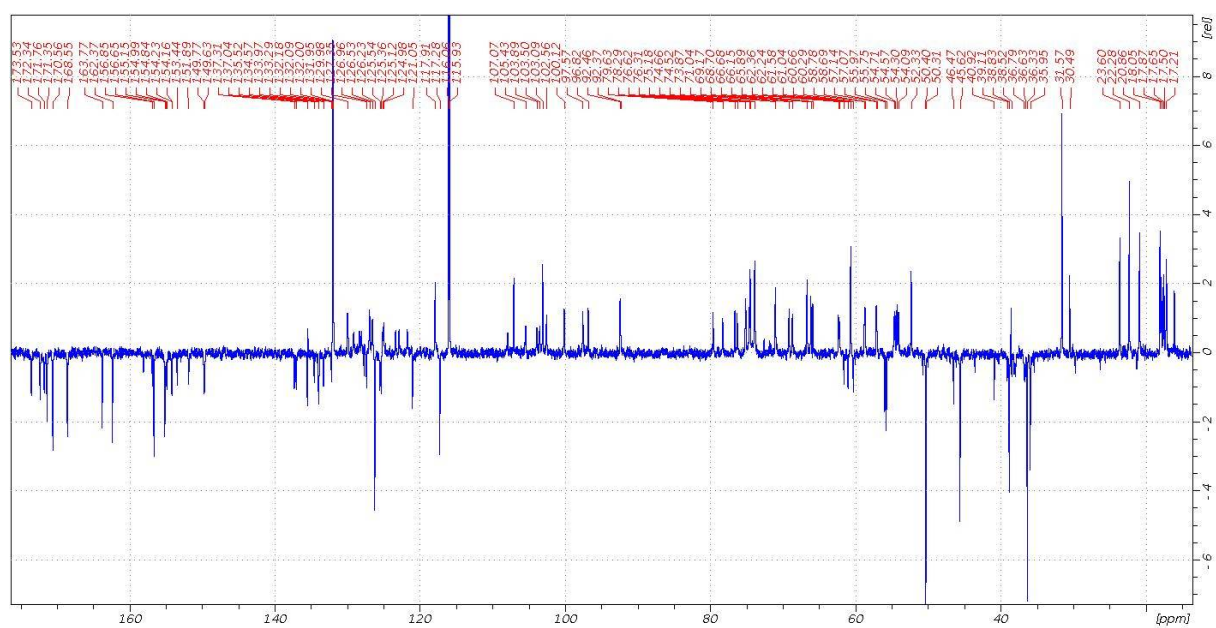

**Figure S9.** 4h,  $^{13}\text{C}$ - NMR, 288K, D<sub>2</sub>O, 700 MHz.

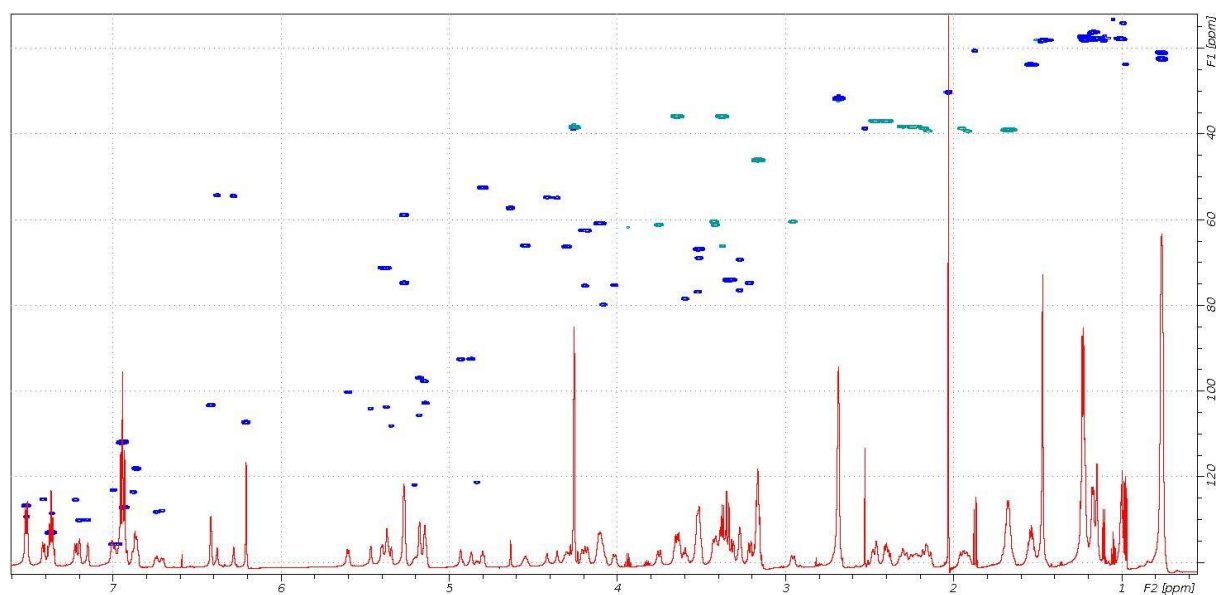

Figure S10. 4j,  $^1\text{H}$ - $^{13}\text{C}$  correlation, 288K, D<sub>2</sub>O, 700 MHz  $^1\text{H}$ -NMR Spectrometer.

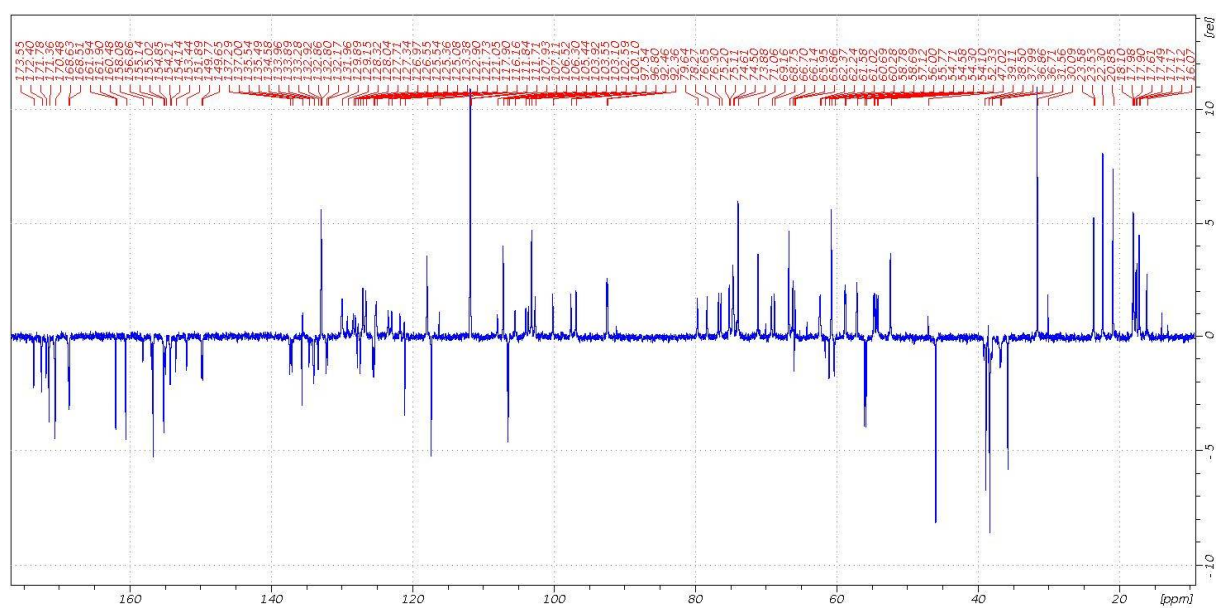

Figure S11. 4j,  $^{13}\text{C}$ -NMR, 288K, D<sub>2</sub>O, 700 MHz.



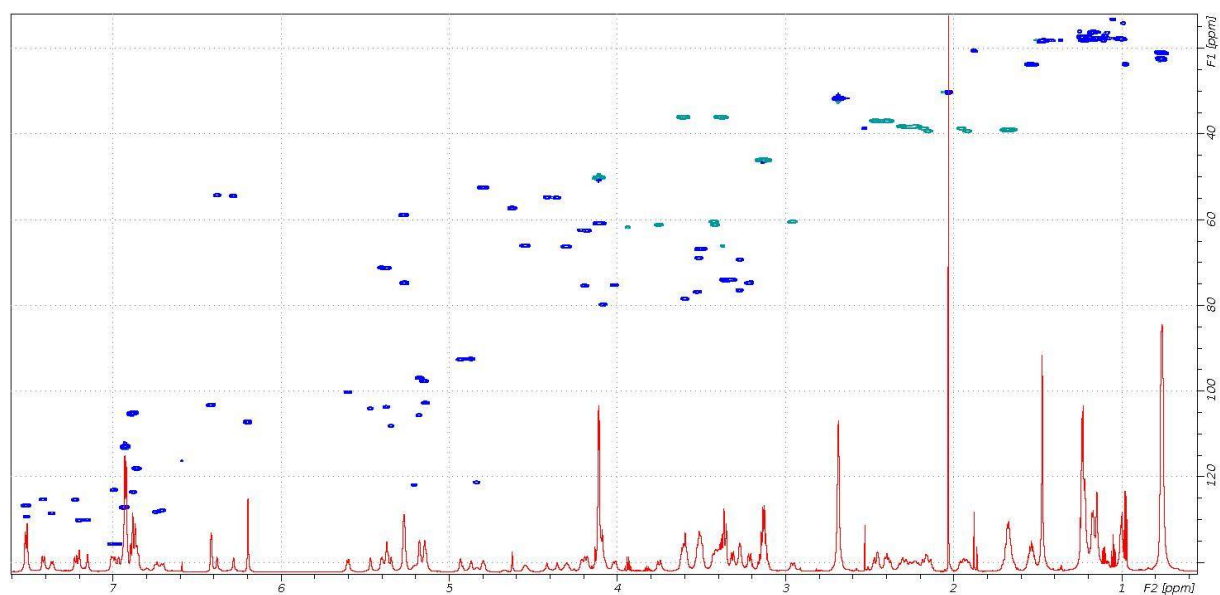

**Figure S12.** 4k,  $^1\text{H}$ - $^{13}\text{C}$  correlation, 288K, D<sub>2</sub>O, 700 MHz  $^1\text{H}$ -NMR Spectrometer.

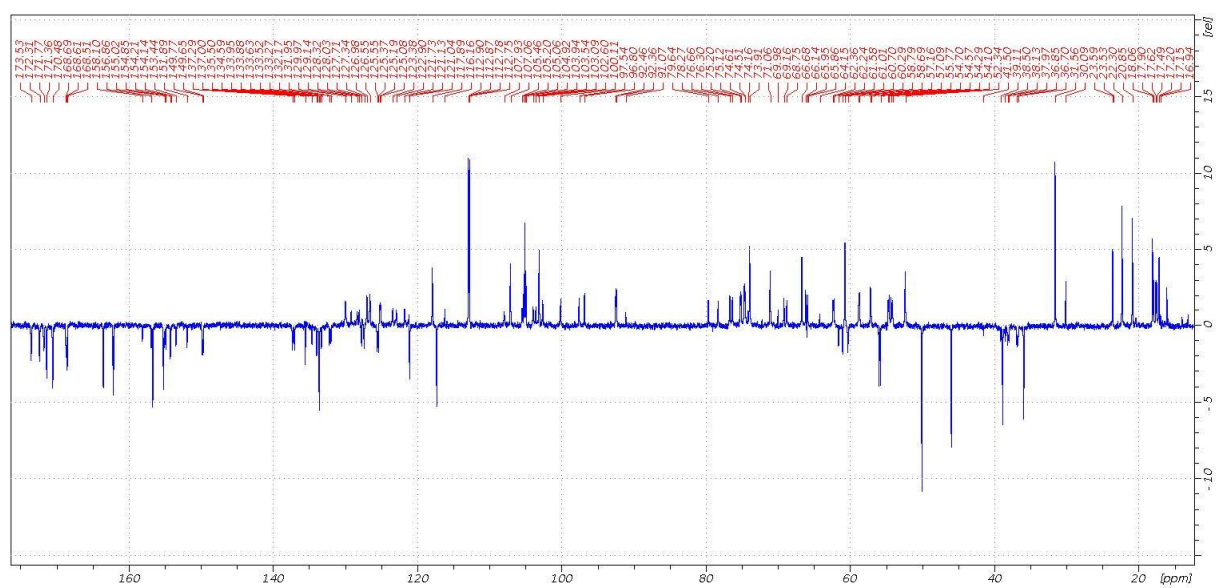

**Figure S13.** 4k,  $^{13}\text{C}$ - NMR, 288K, D<sub>2</sub>O, 700 MHz.

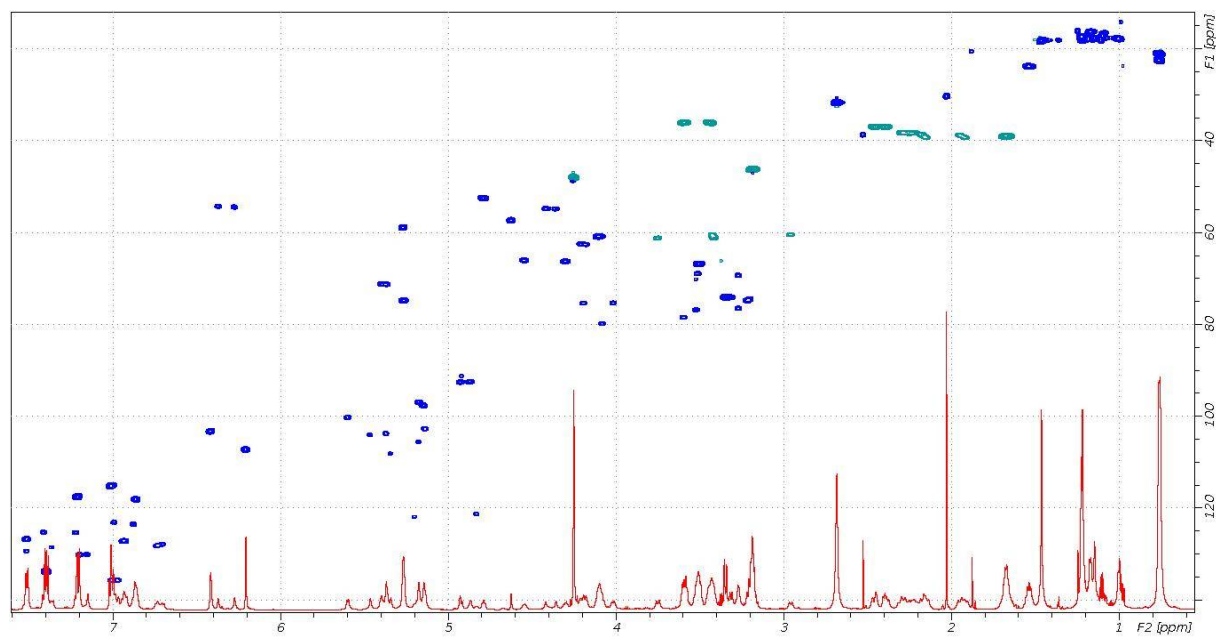

**Figure S14.** 4l,  $^1\text{H}$ - $^{13}\text{C}$  correlation, 288K, D $_2\text{O}$ , 700 MHz  $^1\text{H}$ -NMR Spectrometer.

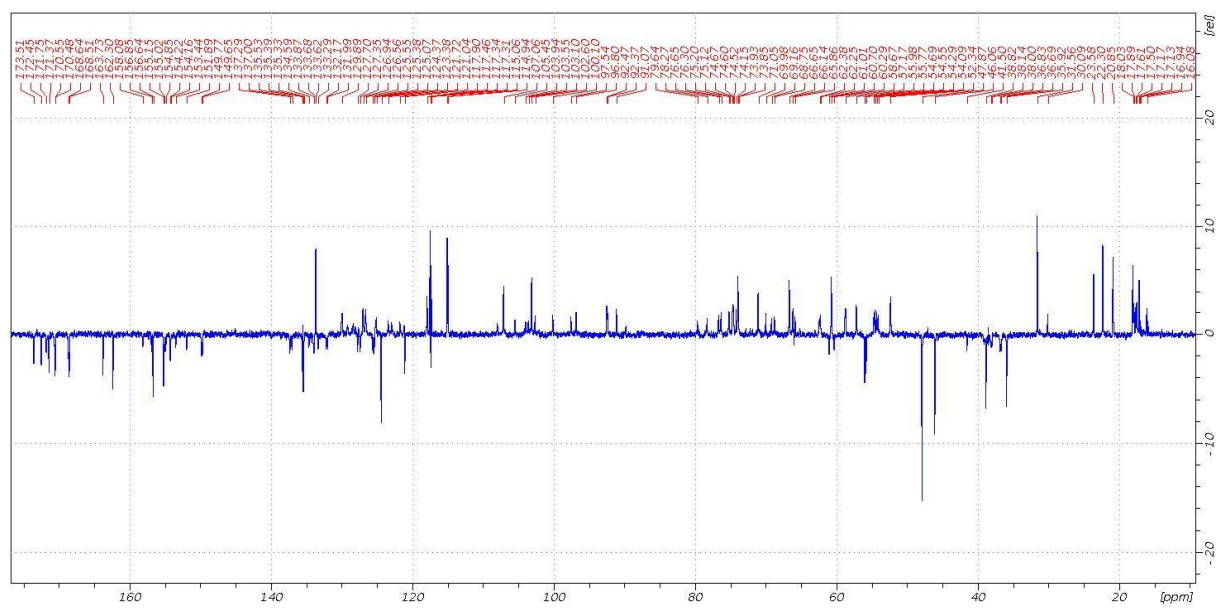

**Figure S15.** 4l,  $^{13}\text{C}$ - NMR, 288K, D $_2\text{O}$ , 700 MHz.



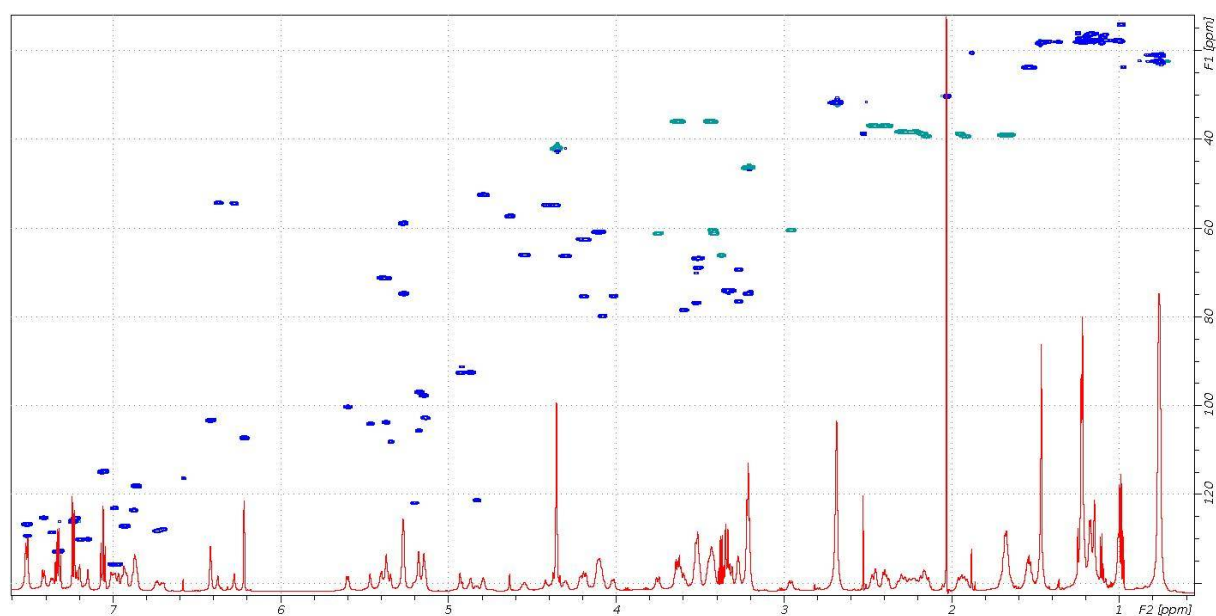

**Figure S16.** 4m,  $^1\text{H}$ - $^{13}\text{C}$  correlation, 288K, D<sub>2</sub>O, 700 MHz  $^1\text{H}$ -NMR Spectrometer.

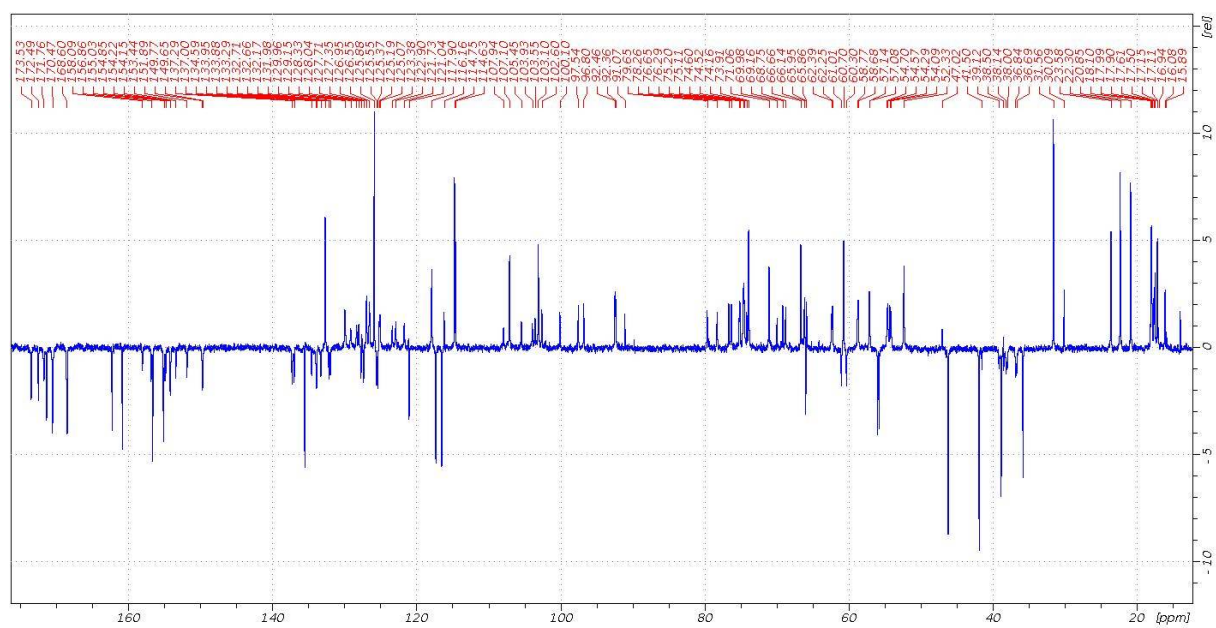

**Figure S17.** 4m,  $^{13}\text{C}$ -NMR, 288K, D<sub>2</sub>O, 700 MHz.

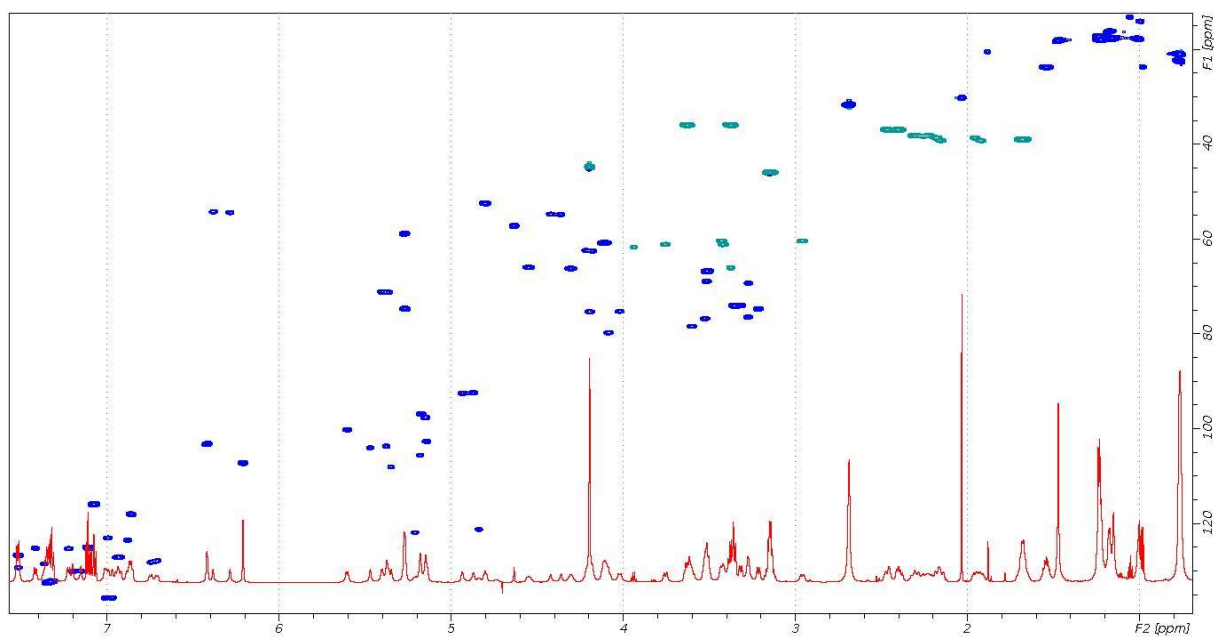

Figure S18. 4p,  $^1\text{H}$ - $^{13}\text{C}$  correlation, 288K, D $_2\text{O}$ , 700 MHz  $^1\text{H}$ -NMR Spectrometer.

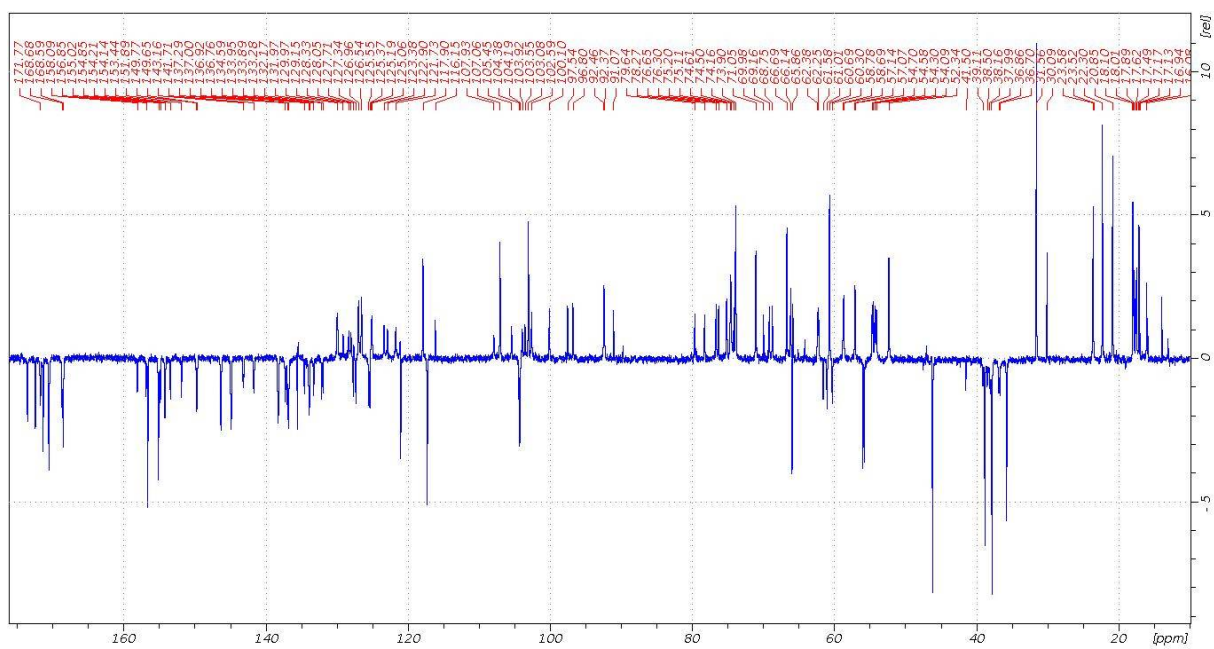

Figure S19. 4p,  $^{13}\text{C}$ - NMR, 288K, D $_2\text{O}$ , 700 MHz.

## Supplementary Data

**Table S1.** C-terminal tags in eremomycin derivatives,  $^{13}\text{C}$  assignments ( $^1\text{H}$  shifts, in case of  $^{13}\text{C}$  overlap). Multiplicity of  $^{13}\text{C}$  signals due to  $^{19}\text{F}$  spin–spin couplings are given as d (doublet) or t (triplet).

| Compound | t1        | t2                    | t3         | t4                    | t5         | t6        | t7         | t8         | t9    | t10   |
|----------|-----------|-----------------------|------------|-----------------------|------------|-----------|------------|------------|-------|-------|
| 4e       | 117.28    | 160.97(d)             | 115.80(d)  | 132.07                | 124.96     | 132.27(d) | 44.68      | 45.84      | 35.85 | -     |
| 4f       | 117.33(d) | 160.92(d)             | 115.75(d)  | 132.01                | 124.89     | 132.21(d) | 44.53/4.13 | 44.57/2.91 | 24.92 | 36.38 |
| 4g       | 132.49(d) | (116.56) <sup>a</sup> | 162.44(d)  | (116.45) <sup>a</sup> | 131.03     | 125.61    | 50.40      | 45.75      | 35.94 | -     |
| 4h       | 126.22    | 131.97(d)             | 116.0(d)   | 163.07(d)             | 116.0(d)   | 131.97(d) | 50.31      | 45.63      | 38.83 | -     |
| 4j       | 106.41(t) | 161.21(d)             | 111.78(d)  | 132.86(t)             | 111.78(d)  | 161.21(d) | 38.26      | 45.92      | 35.73 | -     |
| 4k       | 133.57(t) | 112.83(d)             | 162.81(d)  | 105.06(t)             | 162.81(d)  | 112.83(d) | 50.04      | 45.95      | 35.91 | -     |
| 4l       | (124.37)  | (135.36)              | 117.37(d)  | 163.01(d)             | 114.98(d)  | 133.65(d) | 47.87      | 46.05      | 35.92 | -     |
| 4m       | 116.51(d) | 135.52                | 125.88     | 132.69(d)             | 114.70(d)  | 161.56(d) | 41.89      | 46.19      | 35.80 | -     |
| 4p       | 104.29(t) | 145.62(d)             | 137.54(dt) | 142.43(dt)            | 137.54(dt) | 145.62(d) | 37.82      | 46.16      | 35.77 | -     |

**Table S2.** Partial  $^1\text{H}/^{13}\text{C}$  NMR signal assignment of compound **4e** including several fingerprint assignments.

| Assignment | $^{13}\text{C}$ -shift<br>(ppm) | $^1\text{H}$ -<br>shift<br>(ppm) | $^1\text{H}$ -<br>shift<br>(ppm) |
|------------|---------------------------------|----------------------------------|----------------------------------|
| y8         | 173.53                          | -                                |                                  |
| y7         | 172.37                          | -                                |                                  |
| y4         | 171.76                          | -                                |                                  |
| y5         | 171.36                          | -                                |                                  |
| y3         | 170.53                          | -                                |                                  |
| y1         | 168.63                          | -                                |                                  |
| y6         | 168.52                          | -                                |                                  |
| y2         | 168.51                          | -                                |                                  |
| t2         | 160.97(d)                       | -                                |                                  |
| 7e         | 156.65                          | -                                |                                  |
| 7c         | 155.15                          | -                                |                                  |
| 7a         | 135.53                          | -                                |                                  |
| t6         | 132.27(d)                       | 7.33                             |                                  |
| t4         | 132.07                          | 7.32                             |                                  |
| 6b         | 129.18                          | 7.513                            |                                  |
| 6b*        | 128.36                          | 7.361                            |                                  |
| 6f -6f*    | 128.03                          | 6.740                            |                                  |
| 6f-6f*     | 127.72                          | 6.707                            |                                  |
| t5         | 124.96                          | 7.109                            |                                  |
| 6c         | 123.39                          | 6.879                            |                                  |
| 6c*        | 122.91                          | 6.993                            |                                  |
| 6e         | 121.75                          | 5.206                            |                                  |
| 6e*        | 121.13                          | 4.836                            |                                  |
| 7b         | 117.28                          | -                                |                                  |
| t1         | 117.28                          | -                                |                                  |
| t3         | 115.80(d)                       | 7.073                            |                                  |
| 7f         | 107.11                          | 6.206                            |                                  |
| 7d         | 103.1                           | 6.414                            |                                  |
| g1*        | 102.57                          | 5.138                            |                                  |
| g1         | 100.08                          | 5.601                            |                                  |
| f1         | 97.52                           | 5.147                            |                                  |
| f1         | 96.77                           | 5.176                            |                                  |
| e1         | 92.47                           | 4.931                            |                                  |
| e1         | 92.33                           | 4.868                            |                                  |
| g2 *       | 79.64                           | 4.081                            |                                  |
| g2         | 78.29                           | 3.596                            |                                  |
| g3         | 76.67                           | 3.520                            |                                  |

|        |        |       |       |
|--------|--------|-------|-------|
| g5     | 76.31  | 3.270 |       |
| g3*    | 75.20  | 4.190 |       |
| g5*    | 75.11  | 4.016 |       |
| z6     | 74.56  | 5.264 |       |
| g4*    | 73.907 | 3.349 |       |
| z2     | 71.07  | 5.39  | 5.37  |
| g4     | 68.767 | 3.512 |       |
| x6     | 62.30  | 4.21  | 4.18  |
| g6     | 61.00  | 3.752 |       |
| g6     | 61.00  | 3.413 |       |
| x1     | 60.65  | 4.117 |       |
| g6*    | 60.31  | 2.956 |       |
| x2     | 58.75  | 5.266 |       |
| x7     | 57.11  | 4.63  |       |
| x5     | 54.74  | 4.396 |       |
| x4*    | 54.40  | 6.279 |       |
| x4     | 54.10  | 6.383 |       |
| x3     | 52.34  | 4.796 |       |
| t8     | 45.84  | 3.142 |       |
| t7     | 44.68  | 4.192 |       |
| 1a     | 38.815 | 1.675 |       |
| f2-f2* | 38.517 | 1.949 |       |
| e2-e2* | 38.099 | 2.280 |       |
| 3a     | 36.979 | 2.428 |       |
| t9     | 35.85  | 3.621 | 3.371 |
| g6*    | 30.24  | 3.425 |       |
| 1e     | 30.113 | 2.028 |       |
| 1b     | 23.551 | 1.536 |       |
| 1d     | 22.239 | 0.763 |       |
| 1c     | 20.868 | 0.762 |       |

**Table S3.** Characterization of the strains used in the study.

| <b>Strains</b>                            | <b>Strain characterization</b>                   | <b>Source</b>                                                                                      |
|-------------------------------------------|--------------------------------------------------|----------------------------------------------------------------------------------------------------|
| <i>Staphylococcus aureus</i> ATCC 29213   | Quality control strain                           | Russian Scientific Research Institute of Hematology and Transfusiology                             |
| <i>Staphylococcus aureus</i> 3797         | Glycopeptide intermediate                        | GISA HIP-5836 New Jersey, Lepetit Research Center (LePetit Group, Biosearch S.p.A., Varese, Italy) |
| <i>Staphylococcus aureus</i> 3798         | Glycopeptide intermediate                        | GISA HIP-5827 Michigan, Lepetit Research Center (LePetit Group, Biosearch S.p.A., Varese, Italy)   |
| <i>Staphylococcus aureus</i> R-2          | Clinical isolate, MRSA, resistance to Doripenem  | Multicenter studies of Doripenem                                                                   |
| <i>Staphylococcus haemolyticus</i> 602    | Clinical isolate                                 | Lepetit Research Center (LePetit Group, Biosearch S.p.A., Varese, Italy)                           |
| <i>Streptococcus pneumoniae</i> ATCC 6305 | Quality control strain                           | Russian Scientific Research Institute of Hematology and Transfusiology                             |
| <i>Enterococcus faecium</i> 4             | Clinical isolate, Vancomycin- susceptible.       | Russian Scientific Research Institute of Hematology and Transfusiology                             |
| <i>Enterococcus. faecium</i> 2            | Clinical isolate, Vancomycin- resistance (Van E) | Russian Scientific Research Institute of Hematology and Transfusiology                             |
| <i>Enterococcus faecium</i> 3576          | Clinical isolate, Vancomycin- resistance (VanA)  | N.N.Blokhin Russian Cancer Research Centre                                                         |
| <i>Enterococcus faecalis</i> 9            | Clinical isolate, Vancomycin- resistance (VanB)  | Russian Scientific Research Institute of Hematology and Transfusiology                             |
| <i>Enterococcus faecalis</i> 583          | Clinical isolate, Vancomycin- resistance (Van E) | N.N.Blokhin Russian Cancer Research Centre                                                         |
| <i>Enterococcus faecalis</i> 559          | Clinical isolate, Vancomycin- susceptible.       | Lepetit Research Center (LePetit Group, Biosearch S.p.A., Varese, Italy)                           |
| <i>Enterococcus. gallinarum</i> BП 4147   | Clinical isolate, Vancomycin- resistance         | N.N.Blokhin Russian Cancer Research Centre                                                         |

**Table S4.** Antibacterial activity of vancomycin and derivatives 4a–q against sensitive Gram-positive bacteria.

| Compound   | m | n | R                         | Strain/MIC (Minimum inhibitory concentration, µg/ml)* |                     |                           |                               |                     |                        |
|------------|---|---|---------------------------|-------------------------------------------------------|---------------------|---------------------------|-------------------------------|---------------------|------------------------|
|            |   |   |                           | <i>S.aureus</i> ATCC 29213                            | <i>S.aureus</i> R-2 | <i>S.haemoliticus</i> 602 | <i>S.pneumoniae</i> ATCC 6305 | <i>E. faecium</i> 4 | <i>E. faecalis</i> 559 |
| <b>Van</b> | - | - | -                         | <b>0.25-0.5</b>                                       | 1                   | 2                         | 0,25                          | 4                   | 2                      |
| <b>4a</b>  | 2 | 1 | -                         | 0.25                                                  | 0.03                | 0.5                       | 0.25                          | <b>0.25-0.5</b>     | 0.25                   |
| <b>4b</b>  | 2 | 2 | -                         | 0.5                                                   | 0.06                | 0.5                       | 0.01                          | 0.5                 | 0.5                    |
| <b>4c</b>  | 2 | 1 | -4-CH <sub>3</sub>        | 0.25                                                  | 0.25                | 0.25                      | 0.01                          | 0.25                | 0.25                   |
| <b>4d</b>  | 2 | 1 | -4-OCH <sub>3</sub>       | 0.03                                                  | 0.06                | 0.25                      | 0.01                          | 0.25                | 0.5                    |
| <b>4e</b>  | 2 | 1 | -2-F                      | 0.125                                                 | <b>0.03-0.06</b>    | 0.125                     | 0.01                          | 0.25                | 0.125                  |
| <b>4f</b>  | 3 | 1 | -2-F                      | 0.125                                                 | 0.03                | <b>0.25-0.5</b>           | 0.03                          | 0.25                | <b>0.25-0.5</b>        |
| <b>4g</b>  | 2 | 1 | -3-F                      | 0.03                                                  | 0.06                | 0.5                       | 0.01                          | 0.25                | <b>0.25-0.5</b>        |
| <b>4h</b>  | 2 | 1 | -4-F                      | 0.25                                                  | 0.06                | 0.25                      | 0.01                          | 0.25                | 0.125                  |
| <b>4i</b>  | 2 | 1 | -4-Cl                     | <b>0.125-0.25</b>                                     | 0.25                | 0.25                      | 00.03                         | 0.25                | 0.5                    |
| <b>4j</b>  | 2 | 1 | -2,6-F <sub>2</sub>       | <b>0.03-0.06</b>                                      | 0.06                | 0.125                     | 0.03                          | <b>0.25-0.5</b>     | 0.25                   |
| <b>4k</b>  | 2 | 1 | -3,5-F <sub>2</sub>       | 0.25                                                  | <b>0.125-0.25</b>   | 0.125                     | 0.01                          | 0.5                 | 0.5                    |
| <b>4l</b>  | 2 | 1 | -2-Cl,-4-F                | 0.125                                                 | 0.25                | 0.125                     | <b>0.03-0.06</b>              | 0.25                | 1                      |
| <b>4m</b>  | 2 | 1 | -2-Cl,-6-F                | 0.25                                                  | <b>0.125-0.25</b>   | 0.125                     | 0.06                          | 0.5                 | <b>0.5-1</b>           |
| <b>4n</b>  | 2 | 1 | -2,4-Cl <sub>2</sub>      | 0.5                                                   | <b>0.25-0.5</b>     | 0.25                      | <b>0.03-0.06</b>              | 1                   | 1                      |
| <b>4o</b>  | 2 | 1 | -3,4-Cl <sub>2</sub>      | 1                                                     | 1                   | 0.5                       | 0.5                           | 1                   | 2                      |
| <b>4p</b>  | 2 | 1 | -1,2,3,4,5-F <sub>5</sub> | 0.25                                                  | 0.25                | <b>0.25-0.5</b>           | 0.01                          | 1                   | 1                      |
| <b>4q</b>  | 2 | 1 | -4-CF <sub>3</sub>        | 1                                                     | 2                   | 0.5                       | 0.01                          | 1                   | 2                      |

\*MICs are presented as modal values for 3–5 independently replicated MIC tests for each strain and for the antibiotics. In the range of the obtained MIC values, the obtained modal values are highlighted in bold.



**Table S5.** Antibacterial activity of vancomycin and derivatives 4a–q against resistant Gram-positive bacteria.

| Compound   | m | n | R                         | Strain/MIC (minimum inhibitory concentration; µg/ml) |                      |                     |                        |                      |                        |                                 |
|------------|---|---|---------------------------|------------------------------------------------------|----------------------|---------------------|------------------------|----------------------|------------------------|---------------------------------|
|            |   |   |                           | <i>S.aureus</i> 3797                                 | <i>S.aureus</i> 3798 | <i>E. faecium</i> 2 | <i>E. faecium</i> 3576 | <i>E. faecalis</i> 9 | <i>E. faecalis</i> 583 | <i>E. gallinarum</i><br>BП 4147 |
| <b>Van</b> | - | - | -                         | 8                                                    | 8                    | 8                   | >32                    | 8                    | 32                     | 8                               |
| <b>4a</b>  | 2 | 1 | -                         | 0.5                                                  | <b>0.5-1</b>         | 1                   | <b>1-2</b>             | 0.06                 | 0.5                    | 1                               |
| <b>4b</b>  | 2 | 2 | -                         | 1                                                    | 2                    | 1                   | 2                      | 0.06                 | 0.5                    | 1                               |
| <b>4c</b>  | 2 | 1 | -4-CH <sub>3</sub>        | 0.5                                                  | 1                    | 1                   | 1                      | 0.03                 | <b>1-2</b>             | 0.5                             |
| <b>4d</b>  | 2 | 1 | -4-OCH <sub>3</sub>       | 0.5                                                  | <b>0.5-1</b>         | 0.5                 | <b>0.5-1</b>           | 0.03                 | 0.5                    | 1                               |
| <b>4e</b>  | 2 | 1 | -2-F                      | 0.5                                                  | 1                    | 0.5                 | <b>0.5-1</b>           | <b>0.03-0.06</b>     | <b>0.25-0.5</b>        | 0.5                             |
| <b>4f</b>  | 3 | 1 | -2-F                      | 0.5                                                  | 2                    | 1                   | 1                      | 0.06                 | 1                      | 0.5                             |
| <b>4g</b>  | 2 | 1 | -3-F                      | 1                                                    | 2                    | 0.5                 | 1                      | 0.03                 | <b>0.5-1</b>           | 1                               |
| <b>4h</b>  | 2 | 1 | -4-F                      | 0.25                                                 | 0.5                  | 0.5                 | 2                      | 0.03                 | <b>0.5-1</b>           | <b>0.5-1</b>                    |
| <b>4i</b>  | 2 | 1 | -4-Cl                     | <b>0.25-0.5</b>                                      | 1                    | 0.5                 | 1                      | 0.06                 | <b>0.5-1</b>           | 0.5                             |
| <b>4j</b>  | 2 | 1 | -2,6-F <sub>2</sub>       | 0.5                                                  | 1                    | <b>0.5-1</b>        | 1                      | 0.03                 | 0.5                    | 1                               |
| <b>4k</b>  | 2 | 1 | -3,5-F <sub>2</sub>       | 0.5                                                  | 1                    | 1                   | 1                      | 0.06                 | 1                      | 1                               |
| <b>4l</b>  | 2 | 1 | -2-Cl,-4-F                | 2                                                    | 1                    | 1                   | 2                      | 0.25                 | 1                      | 1                               |
| <b>4m</b>  | 2 | 1 | -2-Cl,-6-F                | 2                                                    | 2                    | 1                   | 2                      | <b>0.25-0.5</b>      | 1                      | 2                               |
| <b>4n</b>  | 2 | 1 | -2,4-Cl <sub>2</sub>      | 1                                                    | 2                    | 2                   | 2                      | 0.25                 | 2                      | 2                               |
| <b>4o</b>  | 2 | 1 | -3,4-Cl <sub>2</sub>      | 2                                                    | <b>1-2</b>           | 2                   | 2                      | <b>0.25-0.5</b>      | 2                      | 2                               |
| <b>4p</b>  | 2 | 1 | -1,2,3,4,5-F <sub>5</sub> | <b>1-2</b>                                           | 4                    | 1                   | 4                      | 0.25                 | 1                      | 2                               |
| <b>4q</b>  | 2 | 1 | -4-CF <sub>3</sub>        | 2                                                    | 2                    | <b>1-2</b>          | 4                      | 0.25                 | 4                      | 4                               |

\*MICs are presented as modal values for 3–5 independently replicate MIC tests for each strain and for the antibiotics. In the range of the obtained MIC values, the obtained modal values are highlighted in bold.
